# Supplementary material for: Nucleofugal behavior of a β-shielded α-cyanovinyl carbanion
Source: publisher site journal article supplement (doi:10.3762/bjoc.14.281), 2018-12-11
Supplement: Additional file 1 [file 1860-5397-14-281-S1.pdf]

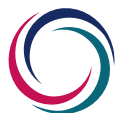

## Supporting Information

for

### Nucleofugal behavior of a $\beta$ -shielded $\alpha$ -cyanovinyl carbanion

Rudolf Knorr and Barbara Schmidt

*Beilstein J. Org. Chem.* **2018**, *14*, 3018–3024. doi:10.3762/bjoc.14.281

### Ion-pair intermediate through desilylation with $\text{Bu}_4\text{N}^+ \text{F}^-$

**The metal-free ion-pair intermediate S3 is generated through desilylation.**

Some of the following formula numbers (Scheme S1) are accompanied in parentheses by the corresponding numbers from the Main Text.

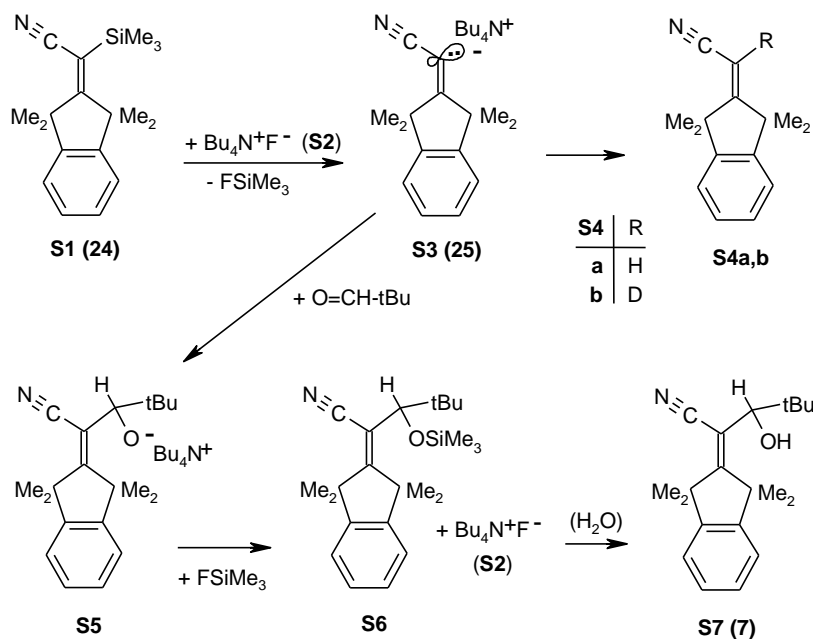

**Scheme S1:** Desilylation of **S1** with production of alkenes **S4a,b** or aldehyde adduct **S7**.

The known [S1]  $\alpha$ -(1,1,3,3-tetramethylindan-2-ylidene)- $\alpha$ -trimethylsilylacetonitrile (**S1** (**24**)) can be desilylated (Scheme S1) by soluble tetrabutylammonium fluoride ( $\text{Bu}_4\text{N}^+\text{F}^-$  (**S2**)): Formation of the metal-free ion pair **S3** in a  $\text{DCCl}_3$  solution of **S1** and **S2** had been recognized [S1] through a deuterium transfer reaction that furnished the completely  $\alpha$ -deuterated alkene **S4b** ( $[\alpha\text{-D}]\mathbf{1}$ ). Trapping of **S3** with pivalaldehyde ( $\text{O=CH-}t\text{-Bu}$ ) was now possible in THF as the solvent at room temperature with catalytic amounts of **S2** ( $\leq 0.05$  equiv) which consumed **S1** almost immediately and yielded roughly equal amounts of alkene **4a** (**1**) and the adduct **S7** (**7**) after aqueous work-up. The consumption of **S1** was slower with reduced amounts of catalyst **S2**, requiring typically 2 hours with 0.01 equiv of **S2** or ca. 21 hours with 0.0036 equiv, while the product ratio of **S4a** and **S7** was always roughly 1:1 and did not depend on the solvents (THF,  $\text{Et}_2\text{O}$ ,  $t\text{-BuOMe}$ , or benzene) and on the period of time prior to work-up. This unexpected product stability was a consequence of the catalytic process which demanded that **S2** should be regenerated from the co-product  $\text{FSiMe}_3$  with a concomitant trimethylsilyl transfer to the emerging reactive primary alkoxide **S5** to give **S6**. This known [S2] kind of  $\text{SiMe}_3$  transfer protected the system from the expected nucleofugal escape of the carbanion unit until **S6** succumbed to desilylation by the

aqueous work-up procedure with hydrolysis to give **S7**. Thus, **S6** could not be characterized; but the system of Scheme S1 explained the surprising adduct stability and described the fate of the  $\text{Bu}_4\text{N}^+$  intermediate in accord with a previously [S2] analyzed, different system.

The expected alkene **S4a** was observed already in situ (before work-up); therefore, its major portion cannot be ascribed to aqueous work-up or to the tiny water content of the completely dissolved reagent  $\text{Bu}_4\text{N}^+ \text{F}^-$  (0.004–0.05 equiv) but may perhaps result through HF elimination from  $\text{Bu}_4\text{N}^+ \text{F}^-$  and subsequent reactions. In any case, the formation of **S4a** from either unconsumed ion pair **S3** or cleaving  $\text{Bu}_4\text{N}^+$  alkoxide **S5** remained an open question.

## References

- S1. Knorr, R.; Schmidt, B.; Mehlstäubl, J.; von Roman, T. *J. Organomet. Chem.* **2018**, *871*, 185–196.
- S2. Briddle, M. M.; Reich, H. J. *J. Org. Chem.* **2006**, *71*, 4031–4039, Figure 1 and cited references therein.
